# Supplementary material for: A prospective cohort study to investigate the transmission and burden of Staphylococcus aureus in Sri Lanka
Source: PubMed Central journal article supplement (PMC11657565; doi:10.1099/mgen.0.001336), 2024-12-19
Supplement: mgen-10-01336-s001.pdf [file mgen-10-01336-s001.pdf]

| Participant ID               | Isolate      | NCBI BioSample number | Participant type  | Age     | Sex    | Isolate type | Infection type       | Infection onset | MLST | spa type | mecA present | SCCmec type | PVL present | TSST present |
|------------------------------|--------------|-----------------------|-------------------|---------|--------|--------------|----------------------|-----------------|------|----------|--------------|-------------|-------------|--------------|
| <b>Staphylococcus aureus</b> |              |                       |                   |         |        |              |                      |                 |      |          |              |             |             |              |
| 0099                         | 057364_SL099 | SAMN40655903          | Additional        | 48      | Male   | Clinical     | Skin and soft tissue | Community       | 2689 | nt       | y            | IVa         | n           | n            |
| 0027                         | 057424_SL027 | SAMN40655941          | Additional        | 35      | Male   | Clinical     | Skin and soft tissue | Healthcare      | 6    | t304     | y            | IVa         | n           | n            |
| 0001                         | 057430_SL001 | SAMN40655944          | Additional        | 57      | Male   | Clinical     | Isolated bacteraemia | missing         | 6    | t6618    | y            | IVa         | n           | n            |
| 0002                         | 057431_SL002 | SAMN40655945          | Additional        | 23      | Female | Clinical     | Respiratory tract    | Community       | 2990 | t091     | n            | NA          | n           | n            |
| 0009                         | 057432_SL009 | SAMN40655946          | Additional        | 52      | Male   | Clinical     | Isolated bacteraemia | Healthcare      | 4006 | t002     | y            | IVc         | y           | n            |
| 0012                         | 057433_SL012 | SAMN40655947          | Additional        | 36      | Male   | Clinical     | Surgical site        | Community       | 97   | t4173    | y            | IVc         | n           | n            |
| 0014                         | 057437_SL014 | SAMN40655950          | Additional        | 21      | Female | Clinical     | Skin and soft tissue | Community       | 6    | t304     | y            | IVa         | n           | n            |
| 0022                         | 057438_SL022 | SAMN40655951          | Additional        | missing | Male   | Clinical     | Skin and soft tissue | Healthcare      | 368  | t425     | y            | IIIa        | n           | n            |
| 0048                         | 057447_SL048 | SAMN40655958          | Additional        | missing | Female | Clinical     | Skin and soft tissue | missing         | 672  | t1240    | n            | NA          | n           | n            |
| 0062                         | 057448_SL062 | SAMN40655959          | Additional        | 54      | Male   | Clinical     | Isolated bacteraemia | Community       | 368  | t425     | y            | IIIa        | n           | n            |
| 0074                         | 057449_SL074 | SAMN40655960          | Additional        | 56      | Male   | Clinical     | Skin and soft tissue | Healthcare      | nt   | t315     | y            | IVh         | n           | n            |
| 0084                         | 057450_SL084 | SAMN40655961          | Additional        | 52      | Male   | Clinical     | Isolated bacteraemia | Healthcare      | 88   | t186     | y            | IVa         | n           | n            |
| 0092                         | 057451_SL092 | SAMN40655962          | Additional        | 69      | Female | Clinical     | Skin and soft tissue | Community       | 672  | t3841    | n            | NA          | n           | n            |
| 0094                         | 057452_SL094 | SAMN40655963          | Additional        | 36      | Male   | Clinical     | Skin and soft tissue | Community       | 72   | t4897    | y            | IVc         | n           | y            |
| 0098                         | 057453_SL098 | SAMN40655964          | Additional        | 48      | Female | Clinical     | Skin and soft tissue | Community       | 5    | t1062    | y            | IVc         | y           | n            |
| 0103                         | 057454_SL103 | SAMN40655965          | Additional        | 58      | Male   | Clinical     | Skin and soft tissue | Healthcare      | 368  | t425     | y            | IIIa        | n           | n            |
| 0115                         | 057455_SL115 | SAMN40655966          | Additional        | 35      | Male   | Clinical     | Surgical site        | Healthcare      | 6    | t304     | y            | IVa         | n           | n            |
| 0118                         | 057456_SL118 | SAMN40655967          | Additional        | 39      | Male   | Clinical     | Surgical site        | Healthcare      | 1    | t127     | y            | IVa         | n           | n            |
| 0128                         | 057457_SL128 | SAMN40655968          | Additional        | 35      | Female | Clinical     | Isolated bacteraemia | Community       | 1    | t127     | y            | IVa         | n           | n            |
| 0040                         | 057463_SL040 | SAMN40655971          | Additional        | 37      | Female | Clinical     | Ear, nose, throat    | missing         | 672  | t3841    | n            | NA          | n           | n            |
| 0067                         | 057464_SL067 | SAMN40655972          | Additional        | 48      | Female | Clinical     | Isolated bacteraemia | Community       | 97   | t267     | y            | IVc         | n           | n            |
| 0075                         | 057465_SL075 | SAMN40655973          | Additional        | 25      | Male   | Clinical     | Skin and soft tissue | Community       | 5    | t002     | y            | IVc         | y           | n            |
| 0080                         | 057466_SL080 | SAMN40655974          | Additional        | 26      | Male   | Clinical     | Skin and soft tissue | Community       | 243  | t021     | n            | NA          | y           | n            |
| 0085                         | 057467_SL085 | SAMN40655975          | Additional        | 71      | Male   | Clinical     | Isolated bacteraemia | Healthcare      | 5    | t002     | y            | IVc         | y           | n            |
| 0088                         | 057468_SL088 | SAMN40655976          | Additional        | 36      | Male   | Clinical     | Surgical site        | Community       | 672  | t003     | n            | NA          | n           | n            |
| 0095                         | 057470_SL095 | SAMN40655977          | Additional        | 59      | Female | Clinical     | Isolated bacteraemia | Community       | 6    | t304     | y            | IVa         | n           | n            |
| 0112                         | 057471_SL112 | SAMN40655978          | Additional        | 34      | Female | Clinical     | Gynaecological       | Community       | 5    | t002     | y            | IVc         | y           | n            |
| 16C1                         | 057399_SL144 | SAMN40655928          | Household contact | 46      | Female | Colonising   | NA                   | NA              | 672  | t3841    | n            | NA          | n           | n            |
| 86C3                         | 057401_SL149 | SAMN40655929          | Household contact | 63      | Male   | Colonising   | NA                   | NA              | 672  | t3841    | n            | NA          | n           | n            |
| 77C3                         | 057403_SL152 | SAMN40655930          | Household contact | 20      | Female | Colonising   | NA                   | NA              | nt   | t18585   | n            | NA          | n           | n            |
| 127C1                        | 057405_SL155 | SAMN40655931          | Household contact | 66      | Female | Colonising   | NA                   | NA              | 672  | t3841    | n            | NA          | n           | n            |

| Participant ID | Isolate      | NCBI BioSample number | Participant type  | Age | Sex    | Isolate type | Infection type       | Infection onset | MLST | spa type | mecA present | SCCmec type | PVL present | TSST present |
|----------------|--------------|-----------------------|-------------------|-----|--------|--------------|----------------------|-----------------|------|----------|--------------|-------------|-------------|--------------|
| 124C3          | 057407_SL157 | SAMN40655932          | Household contact | 17  | Female | Colonising   | NA                   | NA              | 6    | t304     | y            | Ila         | n           | n            |
| 126C4          | 057412_SL164 | SAMN40655934          | Household contact | 9   | Female | Colonising   | NA                   | NA              | 5    | t2051    | y            | IVc         | y           | n            |
| 8C2            | 057413_SL165 | SAMN40655935          | Household contact | 58  | Female | Colonising   | NA                   | NA              | 8    | t008     | n            | NA          | n           | n            |
| 71C1           | 057414_SL166 | SAMN40655936          | Household contact | 46  | Female | Colonising   | NA                   | NA              | 672  | t3841    | n            | NA          | n           | n            |
| 33C1           | 057416_SL168 | SAMN40655937          | Household contact | 61  | Female | Colonising   | NA                   | NA              | 6    | t304     | y            | IVa         | n           | n            |
| 119C1          | 057417_SL171 | SAMN40655938          | Household contact | 56  | Male   | Colonising   | NA                   | NA              | 672  | t3841    | n            | NA          | n           | n            |
| 69C3           | 057420_SL176 | SAMN40655939          | Household contact | 25  | Male   | Colonising   | NA                   | NA              | 8    | t008     | n            | NA          | n           | n            |
| 34C1           | 057421_SL177 | SAMN40655940          | Household contact | 43  | Female | Colonising   | NA                   | NA              | 672  | t3841    | n            | NA          | n           | n            |
| 52C2           | 057425_SL154 | SAMN40655942          | Household contact | 38  | Female | Colonising   | NA                   | NA              | 8    | t008     | n            | NA          | n           | n            |
| 126C3          | 057442_SL159 | SAMN40655954          | Household contact | 15  | Female | Colonising   | NA                   | NA              | 6    | t2196    | y            | IVa         | n           | n            |
| 29C1           | 057444_SL170 | SAMN40655955          | Household contact | 28  | Female | Colonising   | NA                   | NA              | 6    | t2196    | y            | IVa         | n           | n            |
| 52C2           | 057445_SL174 | SAMN40655956          | Household contact | 38  | Female | Colonising   | NA                   | NA              | 672  | t3841    | n            | NA          | n           | n            |
| 116C1          | 057458_SL181 | SAMN40655969          | Household contact | 39  | Female | Colonising   | NA                   | NA              | 6    | t2196    | y            | IVa         | n           | n            |
| 26C1           | 057460_SL185 | SAMN40655970          | Household contact | 63  | Female | Colonising   | NA                   | NA              | nt   | t18585   | n            | NA          | n           | n            |
| 0005           | 057352_SL005 | SAMN40655892          | Index             | 43  | Male   | Clinical     | Skin and soft tissue | Community       | 772  | t657     | y            | UT          | n           | n            |
| 0006           | 057353_SL006 | SAMN40655893          | Index             | 62  | Male   | Clinical     | Skin and soft tissue | Community       | 5    | t002     | y            | IVc         | y           | n            |
| 0008           | 057354_SL008 | SAMN40655894          | Index             | 79  | Female | Clinical     | Skin and soft tissue | Community       | 672  | t3175    | n            | NA          | n           | n            |
| 0020           | 057356_SL020 | SAMN40655895          | Index             | 42  | Male   | Clinical     | Skin and soft tissue | Community       | 97   | t521     | y            | IVa         | n           | n            |
| 0026           | 057357_SL026 | SAMN40655896          | Index             | 33  | Male   | Clinical     | Skin and soft tissue | Community       | 672  | t3841    | n            | NA          | n           | n            |
| 0041           | 057358_SL041 | SAMN40655897          | Index             | 48  | Female | Clinical     | Skin and soft tissue | Community       | 101  | nt       | n            | NA          | n           | n            |
| 0050           | 057359_SL050 | SAMN40655898          | Index             | 29  | Male   | Clinical     | Skin and soft tissue | Community       | 368  | t425     | y            | IIIa        | n           | n            |
| 0051           | 057360_SL051 | SAMN40655899          | Index             | 49  | Male   | Clinical     | Surgical site        | Healthcare      | nt   | nt       | n            | NA          | n           | n            |
| 0053           | 057361_SL053 | SAMN40655900          | Index             | 39  | Male   | Clinical     | Skin and soft tissue | Community       | 6    | t304     | y            | IVa         | n           | n            |
| 0070           | 057362_SL070 | SAMN40655901          | Index             | 58  | Male   | Clinical     | Skin and soft tissue | Community       | 243  | t021     | n            | NA          | y           | n            |
| 0086           | 057363_SL086 | SAMN40655902          | Index             | 44  | Female | Clinical     | Respiratory tract    | Healthcare      | 6    | t304     | y            | IVa         | n           | n            |
| 0109           | 057365_SL109 | SAMN40655904          | Index             | 65  | Male   | Clinical     | Skin and soft tissue | Healthcare      | 5    | t002     | y            | IVc         | y           | n            |
| 0113           | 057367_SL113 | SAMN40655905          | Index             | 41  | Female | Clinical     | Skin and soft tissue | Community       | 6    | t304     | n            | NA          | n           | n            |
| 0069           | 057374_SL140 | SAMN40655906          | Index             | 20  | Female | Clinical     | Skin and soft tissue | Community       | 1    | t127     | y            | IVa         | n           | n            |
| 0004           | 057378_SL004 | SAMN40655909          | Index             | 53  | Female | Clinical     | Skin and soft tissue | Community       | nt   | t425     | y            | IIIa        | n           | n            |
| 0029           | 057380_SL029 | SAMN40655910          | Index             | 65  | Female | Clinical     | Skin and soft tissue | Healthcare      | 6    | t304     | y            | IVa         | n           | n            |
| 0033           | 057381_SL033 | SAMN40655911          | Index             | 25  | Female | Clinical     | Gynaecological       | Community       | 97   | t267     | n            | NA          | n           | y            |
| 0034           | 057382_SL034 | SAMN40655912          | Index             | 21  | Male   | Clinical     | Skin and soft tissue | Community       | nt   | t3841    | y            | V           | n           | n            |

| Participant ID                      | Isolate      | NCBI BioSample number | Participant type  | Age | Sex    | Isolate type | Infection type       | Infection onset | MLST | spa type | mecA present | SCCmec type | PVL present | TSST present |
|-------------------------------------|--------------|-----------------------|-------------------|-----|--------|--------------|----------------------|-----------------|------|----------|--------------|-------------|-------------|--------------|
| 0046                                | 057383_SL046 | SAMN40655913          | Index             | 45  | Male   | Clinical     | Skin and soft tissue | Community       | 243  | t021     | n            | NA          | y           | n            |
| 0052                                | 057384_SL052 | SAMN40655914          | Index             | 67  | Male   | Clinical     | Skin and soft tissue | Community       | 5    | t002     | y            | IVc         | y           | n            |
| 0055                                | 057385_SL055 | SAMN40655915          | Index             | 38  | Male   | Clinical     | Skin and soft tissue | Community       | 121  | t3184    | n            | NA          | y           | n            |
| 0071                                | 057386_SL071 | SAMN40655916          | Index             | 52  | Male   | Clinical     | Surgical site        | Healthcare      | 1    | t127     | y            | IVa         | n           | n            |
| 0077                                | 057387_SL077 | SAMN40655917          | Index             | 52  | Male   | Clinical     | Skin and soft tissue | Community       | 8776 | t127     | n            | NA          | n           | n            |
| 0083                                | 057388_SL083 | SAMN40655918          | Index             | 44  | Male   | Clinical     | Skin and soft tissue | Community       | 5    | t002     | y            | IVc         | y           | n            |
| 0087                                | 057389_SL087 | SAMN40655919          | Index             | 30  | Male   | Clinical     | Surgical site        | Healthcare      | 672  | t3841    | y            | V           | n           | n            |
| 0106                                | 057390_SL106 | SAMN40655920          | Index             | 55  | Female | Clinical     | Skin and soft tissue | Community       | 672  | t3841    | n            | NA          | n           | n            |
| 0116                                | 057391_SL116 | SAMN40655921          | Index             | 50  | Male   | Clinical     | Skin and soft tissue | Community       | 772  | t657     | y            | UT          | y           | n            |
| 0117                                | 057392_SL117 | SAMN40655922          | Index             | 56  | Male   | Clinical     | Skin and soft tissue | Community       | 2700 | t1931    | n            | NA          | n           | n            |
| 0119                                | 057393_SL119 | SAMN40655923          | Index             | 44  | Female | Clinical     | Skin and soft tissue | Community       | 5    | t002     | y            | IVc         | y           | n            |
| 0124                                | 057394_SL124 | SAMN40655924          | Index             | 51  | Female | Clinical     | Skin and soft tissue | Community       | 672  | t3841    | n            | NA          | n           | n            |
| 0126                                | 057395_SL126 | SAMN40655925          | Index             | 20  | Female | Clinical     | Skin and soft tissue | Community       | 12   | t14589   | n            | NA          | n           | n            |
| 0127                                | 057396_SL127 | SAMN40655926          | Index             | 20  | Male   | Clinical     | Skin and soft tissue | Community       | 672  | t3841    | n            | NA          | n           | n            |
| 0078                                | 057398_SL141 | SAMN40655927          | Index             | 19  | Male   | Clinical     | Skin and soft tissue | Community       | 6    | t304     | y            | IVa         | n           | n            |
| 0043                                | 057434_SL043 | SAMN40655948          | Index             | 59  | Male   | Clinical     | Isolated bacteraemia | Community       | 672  | t3841    | n            | NA          | n           | n            |
| 0023                                | 057439_SL023 | SAMN40655952          | Index             | 45  | Male   | Clinical     | Skin and soft tissue | Community       | 6    | t304     | y            | IVa         | n           | n            |
| 0104                                | 057441_SL104 | SAMN40655953          | Index             | 58  | Male   | Clinical     | Isolated bacteraemia | Healthcare      | 5    | t002     | y            | IVa         | y           | n            |
| 0045                                | 057446_SL045 | SAMN40655957          | Index             | 62  | Male   | Clinical     | Skin and soft tissue | Community       | 789  | t8655    | y            | IVa         | n           | n            |
| 0010                                | 057472_SL010 | SAMN40655979          | Index             | 18  | Male   | Clinical     | Skin and soft tissue | Community       | 1    | t948     | n            | NA          | n           | n            |
| 0035                                | 057473_SL035 | SAMN40655980          | Index             | 65  | Male   | Clinical     | Skin and soft tissue | Community       | 672  | t3841    | n            | NA          | n           | n            |
| 0039                                | 057474_SL039 | SAMN40655981          | Index             | 72  | Female | Clinical     | Skin and soft tissue | Community       | 672  | t3841    | n            | NA          | n           | n            |
| 0044                                | 057475_SL044 | SAMN40655982          | Index             | 41  | Female | Clinical     | Skin and soft tissue | Community       | 672  | t1240    | y            | IVc         | n           | n            |
| 0016                                | 057479_SL132 | SAMN40655983          | Index             | 48  | Male   | Clinical     | Isolated bacteraemia | Healthcare      | 672  | t3175    | n            | NA          | n           | n            |
| 0117                                | 057482_SL175 | SAMN40655984          | Index             | 56  | Male   | Colonising   | NA                   | Community       | 5    | t2051    | y            | IVc         | y           | n            |
| <b><i>Staphylococcus aureus</i></b> |              |                       |                   |     |        |              |                      |                 |      |          |              |             |             |              |
| 51C2                                | 057376_SL147 | SAMN40655907          | Household contact | 18  | Male   | Colonising   | NA                   | NA              | 2250 | t6675    | n            | NA          | n           | n            |
| 43C3                                | 057377_SL150 | SAMN40655908          | Household contact | 33  | Female | Colonising   | NA                   | NA              | 2250 | t6675    | n            | NA          | n           | n            |
| 126C2                               | 057408_SL158 | SAMN40655933          | Household contact | 48  | Female | Colonising   | NA                   | NA              | 2250 | t6675    | n            | NA          | n           | n            |
| 8C3                                 | 057426_SL169 | SAMN40655943          | Household contact | 47  | Male   | Colonising   | NA                   | NA              | 2250 | t6675    | n            | NA          | n           | n            |
| 23C1                                | 057436_SL180 | SAMN40655949          | Household contact | 41  | Female | Colonising   | NA                   | NA              | 2250 | t6675    | n            | NA          | n           | n            |

**TABLE S1 Additional information on all sequenced *S. aureus* isolates**

| Infection site       | Community acquired, N = 34 <sup>1</sup> | Hospital acquired, N = 8 <sup>1</sup> |
|----------------------|-----------------------------------------|---------------------------------------|
| blood stream         | 1 (2.9%)                                | 2 (25%)                               |
| gynaecological       | 1 (2.9%)                                | 0 (0%)                                |
| respiratory tract    | 0 (0%)                                  | 1 (13%)                               |
| skin and soft tissue | 32 (94%)                                | 2 (25%)                               |
| surgical site        | 0 (0%)                                  | 3 (38%)                               |

<sup>1</sup>n (%)

**TABLE S2 Anatomical site of infection by onset of infection for index participants**

| Variable                                                | Household <i>S.aureus</i> status |                          | Univariate      |                     |         |
|---------------------------------------------------------|----------------------------------|--------------------------|-----------------|---------------------|---------|
|                                                         | neg, N = 23 <sup>1</sup>         | pos, N = 19 <sup>1</sup> | OR <sup>2</sup> | 95% CI <sup>2</sup> | p-value |
| <b>Household</b>                                        |                                  |                          |                 |                     |         |
| >4 residents                                            | 5 (22%)                          | 7 (37%)                  | 2.10            | 0.54, 8.63          | 0.29    |
| >2 adults                                               | 11 (48%)                         | 13 (68%)                 | 2.36            | 0.68, 8.82          | 0.18    |
| >=1 child                                               | 13 (57%)                         | 10 (53%)                 | 0.85            | 0.25, 2.92          | 0.80    |
| house material quality                                  |                                  |                          |                 |                     |         |
| low                                                     | 15 (65%)                         | 12 (63%)                 | —               | —                   |         |
| medium                                                  | 4 (17%)                          | 5 (26%)                  | 1.56            | 0.34, 7.58          | 0.56    |
| high                                                    | 4 (17%)                          | 2 (11%)                  | 0.63            | 0.08, 3.79          | 0.62    |
| water supply                                            |                                  |                          |                 |                     |         |
| piped                                                   | 5 (22%)                          | 4 (21%)                  | —               | —                   |         |
| filtered                                                | 17 (74%)                         | 13 (68%)                 | 0.96            | 0.21, 4.54          | 0.95    |
| natural                                                 | 1 (4.3%)                         | 2 (11%)                  | 2.50            | 0.17, 66.6          | 0.51    |
| <b>Animals</b>                                          |                                  |                          |                 |                     |         |
| ownership                                               | 22 (96%)                         | 17 (89%)                 | 0.39            | 0.02, 4.36          | 0.45    |
| single                                                  | 12 (52%)                         | 13 (68%)                 | 1.99            | 0.57, 7.38          | 0.29    |
| multiple                                                | 11 (48%)                         | 6 (32%)                  | 0.50            | 0.14, 1.75          | 0.29    |
| domestic                                                | 22 (96%)                         | 16 (84%)                 | 0.24            | 0.01, 2.09          | 0.24    |
| livestock                                               | 3 (13%)                          | 4 (21%)                  | 1.78            | 0.34, 10.2          | 0.49    |
| <b>Household member medical issue in last 12 months</b> |                                  |                          |                 |                     |         |
| hospitalised                                            | 15 (65%)                         | 9 (47%)                  | 0.48            | 0.13, 1.65          | 0.25    |
| outpatients                                             | 23 (100%)                        | 18 (95%)                 | 0.00            |                     | >0.99   |
| infection                                               | 7 (30%)                          | 7 (37%)                  | 1.33            | 0.36, 4.93          | 0.66    |

<sup>1</sup>n (%)

<sup>2</sup>OR = Odds Ratio, CI = Confidence Interval

**TABLE S3 Risk factor analysis for household positivity (at least one member colonised with *S. aureus*)**
